1 Surface sampling for SARS-CoV-2 in workplace outbreak settings in  
2 the UK, 2021-22.

3 Ian Nicholls<sup>1</sup>, Antony Spencer<sup>1</sup>, Yiqun Chen<sup>2</sup>, Allan Bennett<sup>1</sup> and Barry Atkinson<sup>1</sup>.

4 <sup>1</sup>Research and Evaluation, UK Health Security Agency, Porton Down, Salisbury, United Kingdom.

5 <sup>2</sup>Science Division, Health and Safety Executive, Buxton, United Kingdom.

6

7 Correspondence: Barry Atkinson ([barry.atkinson@ukhsa.gov.uk](mailto:barry.atkinson@ukhsa.gov.uk))

8 Keywords: SARS-CoV-2; COVID-19; Workplace; Environmental Surface Sampling; Outbreak; Cluster;  
9 Fomite; Transmission.

10

11 Word count: Abstract = 192; Text = 3780

12

13 **ABSTRACT**

14 **Aims:** To utilise environmental surface sampling to evaluate areas of SARS-CoV-2 contamination  
15 within workplaces to identify trends and improve local COVID-control measures.

16 **Methods and Results:** Surface sampling was undertaken at 12 workplaces that experienced a cluster  
17 of COVID-19 cases in the workforce between March 2021 and March 2022. 7.4% (61/829) of samples  
18 collected were positive for SARS-CoV-2 RNA by qPCR with only 1.8% (15/829) of samples identified  
19 with crossing threshold (Ct) values below 35.0. No sample returned whole genome sequence  
20 inferring RNA detected was degraded.

21 **Conclusions:** Few workplace surface samples were positive for SARS-CoV-2 RNA and positive  
22 samples typically contained low levels of nucleic acid. Although these data may infer a low  
23 probability of fomite transmission or other forms of transmission within the workplace, Ct values  
24 may have been lower at the time of contamination. Workplace environmental sampling identified  
25 lapses in COVID-control measures within individual sites and showed trends through the pandemic.

26 **Significance and Impact of the Study:** Prior to this study, few published reports investigated SARS-  
27 CoV-2 RNA contamination within workplaces experiencing cases of COVID-19. This report provides  
28 extensive data on environmental sampling identifying trends across workplaces and through the  
29 pandemic.

## 30 INTRODUCTION

31 Severe acute respiratory syndrome coronavirus 2 (SARS-CoV-2) is the etiological cause of  
32 coronavirus disease 2019 (COVID-19) which emerged in Wuhan, China in late 2019. By March 2020,  
33 SARS-CoV-2 had spread globally and was declared a pandemic by the World Health Organisation  
34 (WHO, 2020).

35 The UK government's initial COVID-19 control measures included limiting social interactions and  
36 substantially reducing occupancy within non-essential workplaces. While these measures limited  
37 potential exposure to SARS-CoV-2, the scope of workplaces deemed as essential meant millions of  
38 people were required to attend their place of work with an estimated 30% of adult workers required  
39 to travel to their place of work during the first UK lockdown period in May 2020 rising to 50% by May  
40 2021 (ONS, 2021). These key-workers were found to have had experienced a greater exposure to,  
41 and be at increased risk of COVID-19 infection (Brown, Coventry & Pepper, 2021; Topriceanu *et al.*,  
42 2021).

43 While the majority of workplace COVID-19 outbreaks were associated with short- and long-term  
44 care facilities including hospitals, numerous outbreaks were also reported in non-care sectors  
45 including manufacturing, retail, education and hospitality (European Centre for Disease Prevention  
46 and Control, 2020; Chen *et al.*, 2022; Hosseini *et al.*, 2022). Congregate settings where workers are  
47 frequently in close proximity were notably affected with early reports from industries such as meat  
48 processing facilities and correctional institutes (Dyal *et al.*, 2020; Saloner *et al.*, 2020); however,  
49 outbreaks were reported in all workplace sectors.

50 A core component of understanding transmission risk within the workplace is identifying areas with  
51 SARS-CoV-2 contamination. These data not only identify higher risk areas or places where infection  
52 control measures require strengthening, but also highlight potential transmission risk areas through  
53 fomite transmission. Studies have shown that SARS-CoV-2 can remain viable on surfaces for  
54 numerous days after deposition (Riddell *et al.*, 2020; van Doremalen *et al.*, 2020; Paton *et al.*, 2021;

55 Sun *et al.*, 2022) while the nucleic acid can be detected for numerous weeks (Liu *et al.*, 2021a,  
56 2021b; Paton *et al.*, 2021; Coil *et al.*, 2022). The persistence of SARS-CoV-2 viral particles and nucleic  
57 acid on surfaces therefore allows for sampling of workplaces to determine potential risk areas and  
58 transmission risk among workers.

59 As part of the COVID-19 Outbreak investigation to Understand Transmission study (COVID-OUT)  
60 study, environmental surface sampling was conducted at workplaces reporting cases of COVID-19  
61 within their workforce to establish areas of contamination within workplaces, potential routes of  
62 transmission, and to learn lessons from workplace outbreaks which can be incorporated into wider  
63 guidance. The data generated could also provide insight into whether COVID-19 cases affecting  
64 businesses are predominately workplace-related (resulting from factors within the work  
65 environment) or workforce-related resulting from interactions outside of a place of work and  
66 beyond the control of the employer.

67

## 68 **METHODS**

### 69 **Recruitment to the COVID-OUT study**

70 Workplaces in the UK are required to report potential outbreaks to the Health and Safety Executive  
71 (HSE) and United Kingdom Health Security Agency (UKHSA). Identification and recruitment of  
72 workplaces experiencing cases of COVID-19 in their workforce was conducted using these databases  
73 as part of the wider COVID-OUT study (Chen *et al.*, 2021). To be eligible for inclusion in this study, a  
74 workplace was required to have an attack rate of  $\geq 5\%$  at the time of notification in a workforce of  
75  $\geq 100$  workers as well as qualifying as one of the following facilities: food processing plants, general  
76 manufacturing facilities, packaging and distribution centres, or large office buildings. Smaller  
77 workplaces ( $< 100$  workers) were approached if  $> 5$  workers were infected at the time of notification

78 with projected increases. Workplaces meeting the criteria for study inclusion were approached for  
79 approval to participate in the study including the option for environmental surface sampling.

80 In addition, two control sites were sampled at separate times during the course of the study to  
81 represent the background levels of surface contamination which could be expected from a  
82 workplace which was not experiencing, and had not recently experienced, an elevated level of  
83 COVID-19 infections.

#### 84 **Surface sampling**

85 Environmental surface sampling was performed as soon as practicable after a participation  
86 agreement was in place. An on-site reconnaissance of the overall work environment was carried out  
87 to identify priority areas for sampling such as door handles, toilets, canteens, high-occupancy  
88 workstations/desks and locker rooms. Areas occupied by workers who had been recently diagnosed  
89 with COVID-19 infection were also targeted.

90 Surface sampling was carried out using either Blue Stick Sponge Swabs (Technical Service  
91 Consultants, TS/15-SH) or Blue Sponge Swabs (Technical Service Consultants, TS/15-B) for flat  
92 surfaces, and Universal Transport Medium (UTM) Swabs (Copan, 366C) for smaller or more detailed  
93 surface areas such as door handles. Where possible, samples were collected from an approximate  
94 10cm x 10cm area to allow for estimation of contamination should heavily contaminated  
95 environments be identified. For each sample, an estimate of the area sampled was recorded in  
96 addition to the type of environment sampled and whether the sample was from a 'high-touch' area  
97 (likely to be contacted at least twice per working day by at least two separate individuals).

98 Sample team members wore an IR11 surgical mask and two pairs of nitrile gloves to prevent potential  
99 (cross-)contamination of samples in addition to any other personal protective equipment required to  
100 operate in the specific work environment e.g., ear defenders. Collected samples were packaged into

101 a UN3373 rated container for transport back to the laboratory and stored at 4°C until subsequent  
102 processing (16-60hrs).

### 103 **Sample Analysis**

104 Samples were processed within a class II microbiological safety cabinet. Sponge samples were  
105 manually massaged by hand for approximately 30 seconds in their sample bags to homogenise the  
106 sample and release absorbed buffer which was then removed from the bag using a serological  
107 pipette and stored in a 2mL Sarstedt tube. UTM swabs were pressed against the inside edge of the  
108 collection tube in a rolling motion to release any retained UTM which was then removed by pipette  
109 and stored in a 2mL Sarstedt tube. When lysis and RNA purification was not carried out immediately,  
110 samples were placed into storage in a -80°C freezer.

111 SARS-CoV-2 RNA was extracted and purified from samples using QIAamp Viral RNA Mini Kit (Qiagen,  
112 52906) following the manufacturer's centrifuge protocol. Quantitative PCR (qPCR) was carried out  
113 using the Viasure SARS-CoV-2 detection kit (CerTest, VS-NC02) following manufacturer's instructions.  
114 The targets for this assay were the SARS-CoV-2 nucleocapsid gene (N) and polyprotein open reading  
115 frame 1a and 1b (ORF1ab). Assay analysis was performed on a QuantStudio 5 thermocycler (Applied  
116 Biosystems) against an in-house N gene standard curve to determine approximate genome copy  
117 number in positive samples. The cycling conditions were as follows: one reverse transcription cycle  
118 of 45°C for 15 mins followed by denaturation at 95°C for 2 mins, then 45 cycles of 95°C for 10 secs  
119 and 60°C for 50 secs with quantification of fluorescence performed at the end of 60°C step. All  
120 samples were tested in duplicate against both targets. Samples were deemed positive when both  
121 duplicate tests returned a valid crossing threshold (Ct) value for either target. If only a single  
122 replicate returned a valid Ct value, repeat analysis was performed; if the same result was returned  
123 the sample was referred to as 'suspected positive' unless two valid Ct values were recorded for the  
124 other target. Samples were deemed negative when no Ct value was returned for either replicate in  
125 both targets. Invalid Ct values were those above Ct 38.0 which is the upper limit described by the kit

126 manufacturer; samples with Ct values above 38.0 were deemed as 'technical negatives' and  
127 considered as negatives.

## 128 **Additional analysis**

129 Samples returning Ct values of  $\leq 35.0$  cycles were subjected whole genome sequencing using the  
130 ARTIC Network protocol (Quick, 2020, using v4.1 primers) to elucidate detailed genetic composition  
131 of the contaminating virus. Any sample returning complete viral genome would be eligible for viral  
132 isolation to demonstrate the presence of infectious virus.

133

## 134 **RESULTS**

### 135 **Workplace recruitment**

136 Environmental surface sampling for SARS-CoV-2 contamination was performed at 12 workplaces  
137 (Sites 001-005, 007-010, 012-013 and 020) and two control sites (C1 and C2) between March 2021  
138 and March 2022 (Table 1). The recruited sites spanned numerous essential workplace sectors  
139 including manufacturing (four sites), food (four sites), office-based workplaces (two sites),  
140 distribution (one site) and critical infrastructure (one site); the two control sites were both within  
141 the critical infrastructure sector. Cases of COVID-19 among the workforce of recruited sites had  
142 either ceased or were declining in all cases at the time of environmental sampling; however, cases of  
143 COVID-19 were still being reported among the workforce at sites 002, 003, 005 and 008 when  
144 sampling was performed. Sites 001, 002, 003, 004, 005, 010, 012 and 013 met the inclusion criteria  
145 of  $\geq 100$  employees and  $\geq 5\%$  attack rate at the time of the outbreak report; sites 008, 009 and 020  
146 had  $\leq 100$  staff but  $\geq 5$  confirmed cases at the time of the outbreak report with projected increases.  
147 Site 005 did not achieve a  $\geq 5\%$  attack rate in its workforce of more than 1000 employees; however,  
148 this site recorded a large number of cases in a short period of time and was recruited based on

149 projected increases. The two control sites both had  $\geq 300$  staff but without indication of a potential  
150 outbreak within the workplace; however, both sites had sporadic cases at the time of sampling.

151 The complex recruitment process resulted in several sites being sampled at least two weeks from  
152 the last reported case in the work environment linked to the reported outbreak (sites 004, 007, 009,  
153 012 and site 013).

154

### 155 **Detection of SARS-CoV-2 RNA across workplaces**

156 A total of 829 samples were collected from the 12 recruited workplaces (average = 63.7 samples per  
157 site). 723 samples (87.2%) were negative for SARS-CoV-2 RNA; 61 samples (7.4%) were identified as  
158 positive for SARS-CoV-2 RNA and 45 samples (5.4%) identified as suspected positive (Table 2). Only  
159 15/829 (1.8%) of samples collected across the 12 workplaces returned Ct values of  $\leq 35.0$ . Estimated  
160 genome copy numbers for samples with Ct values of  $\leq 35.0$  ranged from  $6.8 \times 10^2$  to  $6.6 \times 10^3$  genomic  
161 copies/cm<sup>2</sup>.

162 A total of 136 samples were collected from two control sites (average = 68 per site) that were not  
163 currently experiencing an outbreak of SARS-CoV-2. 131 samples (96.4%) were negative for SARS-  
164 CoV-2 RNA and one sample (0.7%) was identified as positive with another four samples (2.9%)  
165 identified as suspected positive (Table 3). The lowest Ct value identified at the control sites was 36.9;  
166 estimated genome copy numbers for the five samples returning a Ct value ranged from  $1.1 \times 10^2$  to  
167  $1.2 \times 10^3$  genomic copies/cm<sup>2</sup>.

168 As shown in Figure 1, samples collected at the first three workplaces (sites 001-003; March – early  
169 May 2021) had a high proportion of positive samples (12.1-38.9%). In contrast, from late May 2021  
170 onwards (Sites 004-020), only one site was identified with  $>3\%$  of positive samples. A similar trend  
171 was seen with samples identified as ‘suspected positive’ with 8.3-18.4% of samples collected at the  
172 first five sites (March-June 2021) whereas no site was identified with more than 2.4% of samples as



173 suspected positive after June 2021. The outlier in terms of positive samples was the first of two visits  
174 to Site 008 (September 2021) where 16.7% of samples were positive; this investigation was  
175 conducted at the start of a rise in community cases associated with the Delta variant in a workplace  
176 with a 55% attack rate among the workforce (Atkinson *et al.*, 2022).

177 Only 15/829 (1.8%) of samples collected at recruited workplaces returned Ct values of  $\leq 35.0$ . These  
178 15 samples were identified at four distinct sites: 001 (n=2), 003 (n=7), 005 (n=1) and 008 (n=5).

179 No positive or suspected positive samples were found at four of the 12 workplaces sampled (007,  
180 010, 012 and 013), and in the final six months of the study (sites 009-010, 012-013 and 020) no  
181 positive samples (0/330; 0.0%) and only two suspected positive samples (2/330; 0.6%) were  
182 identified.

### 183 **Detection of SARS-CoV-2 RNA within workplaces**

184 SARS-CoV-2 RNA was detected in nearly all types of workplace environment (Figure 2). The highest  
185 rate of confirmed positivity was observed in locker rooms (13.4%) followed by general work areas  
186 (8.8%), ventilation (6.9%), canteens (4.2%) and toilets (2.0%). No positive samples were identified in  
187 corridors or from samples collected outside.

188 The level of suspected positive samples was broadly similar for work areas, canteens, locker rooms  
189 and toilets (6.6-9.0%). The level of suspected positives was higher for ventilation (13.8%) and for  
190 outside samples (25.0%); however, only four samples were collected from outside environments. No  
191 suspected positive samples were identified from corridors.

192 Samples with qPCR Ct values  $\leq 35.0$  cycles were only identified in locker rooms (4.5%), toilets (2.0%),  
193 work areas (1.8%) and canteens (1.2%).

194 524 of the 829 samples collected from recruited workplaces were classified as being from 'high-  
195 touch' locations (Figure 3). Levels of confirmed positivity were broadly similar for high-touch  
196 samples versus all samples from that environment for work areas (7.5% vs 8.8%), canteens (4.5% vs

197 4.2%) and toilets (2.9% vs 2.0%); however, there was a small reduction in the positivity rate for high-  
198 touch samples in locker rooms (9.1% vs 13.4%) and no positive samples were identified from high-  
199 touch ventilation samples (0.0% vs 6.9%). As there were no positive samples identified in any  
200 corridor or outside sample, none of the high-touch samples in these groups were positive.

201 A similar trend was seen in suspected positive samples with comparable levels for high-touch  
202 samples versus all samples in that environment for outside samples (25.0% vs 25.0%), work areas  
203 (7.2% vs 7.0%), and canteens (6.4% vs 6.6%). There was an apparent reduction in suspected  
204 positivity rate in high-touch samples for toilets (5.9% vs 7.8%), locker rooms (4.5% vs 9.0%) and  
205 ventilation samples (0.0% vs 13.8%). As there were no suspected positive samples identified in any  
206 corridor sample, none of the high-touch samples in this group was suspected positive.

207 For samples with a Ct value  $\leq 35.0$ , levels were marginally higher for high-touch samples versus all  
208 samples in that environment for toilets areas (2.9% vs 2.0%), work areas (2.1% vs 1.8%) and  
209 canteens (1.3% vs 1.2%). No Ct values  $\leq 35.0$  were identified in high-touch locker room samples  
210 compared to 4.5% of all samples with Ct values  $\leq 35.0$  within this environment. As there were no  
211 samples with Ct values  $\leq 35.0$  identified in any ventilation, corridor, or outside sample, none of the  
212 high-touch samples in these groups had Ct values  $\leq 35.0$ .

213

#### 214 **Whole genome sequence analysis**

215 The 15 samples returning N gene Ct values of  $\leq 35.0$  (32.7 to 35.0) were subjected to whole genome  
216 sequence analysis. No sample yielded complete genome data and only two samples generated any  
217 contiguous sequence once quality control standards were applied. Approximately 55% of the SARS-  
218 CoV-2 genome was recovered from a sample collected from a window handle at Site 008; however,  
219 the longest contiguous sequence was ~1300 bases implying the nucleic acid was sheared potentially  
220 through degradation in the environment from the contamination event until the point of sampling

221 (>9 days). The other sample to return sequence data was collected in a toilet at Site 005; however,  
222 <500 bases were called representing just over 2% of the viral genome.

223

## 224 **DISCUSSION**

225 Workplace outbreaks of COVID-19 were common across multiple workplace sectors during the  
226 pandemic despite significant efforts including government guidance and frameworks aimed at  
227 reducing the spread of infection. While government guidance and workplace COVID-control  
228 measures were aimed at reducing transmission of COVID-19 within the workplace, the effect of non-  
229 workplace transmission among the workforce is difficult to elucidate. Workforce mixing can occur in  
230 non-workplace locations such as social locations, transport to and from the workplace, and within  
231 the home. This study aimed to investigate areas of surface contamination within workplaces which  
232 experienced a recent COVID-19 outbreak and use this data to inform improvements to control  
233 measures which can mitigate reoccurrence.

234 Between March 2021 and March 2022, 829 surface samples were collected from 12 workplaces that  
235 recently experienced an outbreak of COVID-19 among their workforces. These workplaces were  
236 located across the United Kingdom spanning multiple business sectors and encompassing a variety  
237 of workforce sizes. Across all sites visited, only 7.4% of samples collected were identified as positive  
238 by qPCR analysis with a further 5.4% identified as 'suspected positive' likely indicating SARS-CoV-2  
239 genetic material close to the limit of detection for the assay. The remaining 87.2% of samples  
240 collected were negative. Estimates of genome copies per cm<sup>2</sup> of SARS-CoV-2 RNA positive surface  
241 samples were calculated using a standard curve with no sample collected exceeding 6.6x10<sup>3</sup> genomic  
242 copies/cm<sup>2</sup>. While finding limited amounts of SARS-CoV-2 nucleic acid at sites reporting a COVID-19  
243 cases may seem counter-intuitive, low levels of contamination were reported in similar studies  
244 including the in areas recently occupied by symptomatic workers (Gholipour *et al.*, 2020; Marshall *et*  
245 *al.*, 2020; Mouchtouri *et al.*, 2020; Cherrie *et al.*, 2021; Marcenac *et al.*, 2021; de Rooij *et al.*, 2023)

246 and in some clinical settings occupied by infected patients (Ryu *et al.*, 2020; Goel *et al.*, 2022;  
247 Warren *et al.*, 2022). Two control sites were also sampled as part of this study; both positive and  
248 suspected positive samples were identified at these sites albeit at lower levels than in recruited  
249 sites. These findings are likely due to both control sites reporting COVID-19 cases near the time of  
250 sampling; however, the levels were below the inclusion criteria for the study.

251 Samples with Ct values less than 35.0 were detected only at four sites (sites 001, 003, 005, and 008)  
252 and in no samples collected after September 2021. The five samples with Ct values of  $\leq 35.0$  at Site  
253 008 were identified after the apparent decrease in environmental surface sampling positivity rates  
254 seen in late May 2021 implying that a decrease in the proportion of samples identified as SARS-CoV-  
255 2 positive does not necessarily correlate with level of contamination that can be observed when  
256 positive samples are identified. The reduction in sample positivity levels after May 2021 and the  
257 absence of positive samples after September 2021 is likely due to a combination of factors. It is  
258 possible that one significant factor was the impact from the COVID-19 vaccine rollout starting in  
259 December 2020 with more than 34 million priming vaccine doses administered by May 2021  
260 (GOV.UK, 2022). As vaccines were made available using a tiering system based on age and at-risk  
261 status, most working age individuals would likely have received at least one dose by summer 2021  
262 when environmental sampling positivity rates declined. Some studies suggest that vaccine status has  
263 no effect on viral titre and shedding by infected individuals (Boucau *et al.*, 2022; Riemersma *et al.*,  
264 2022); however, other studies suggest that infectious viral titre and/or shedding duration is reduced  
265 in vaccinated individuals (Ke *et al.*, 2022; Plante *et al.*, 2022; Puhach *et al.*, 2022; Tian *et al.*, 2022).  
266 Additionally, a ferret model study found a significant reduction in viral titre in both nasal wash and  
267 oral swabs amongst animals vaccinated with only a primer dose of Astra-Zeneca vaccine 7 days after  
268 viral challenge (Marsh *et al.*, 2021). A reduction in viral titre and shortened shedding therefore may  
269 reduce environmental contamination from vaccinated cases.

270 Samples producing Ct values of  $\leq 35.0$  were submitted for whole genome sequencing; however, only  
271 two yielded sequence data and neither returned more than 55% of the genome. The inability to  
272 recover full genome sequence infers degradation of genomic material between the original  
273 deposition and environmental sampling. While this suggests the lack of infection-competent  
274 material in the samples collected, these contamination events may have harboured infectious  
275 material prior to sampling and does not conclusively rule out the potential for fomite transmission in  
276 the workplace.

277 Comparison of the types of surfaces sampled showed positives and suspected positives from all  
278 major surface types. Samples from locker rooms were the most common area to return a qPCR  
279 positive (13.8% of locker room samples) and a Ct value  $\leq 35.0$  (4.5% of locker room samples)  
280 indicative of higher amount of nucleic acid; this may reflect an increased risk due to being a small  
281 congregative area but could also reflect an oversight of local COVID control measures and cleaning  
282 regimens as most locker rooms did not have the same cleaning standards seen elsewhere in the  
283 workplaces. Toilets, canteens and general work areas had a comparably lower rate of positivity, and  
284 high-touch surfaces had comparable, or lower, rates of positivity in all environments; it is likely that  
285 enhanced cleaning regimens in high-use work areas contribute to these findings.

286 Data generated as part of this study provided site-specific information that was used to improve  
287 local COVID-19 control measures. A report of surface contamination and interpretation was  
288 provided to each site within five working days of sampling allowing for alterations to cleaning and  
289 infection control regimes locally if required. For example, sampling of Site 008 identified a Ct 33.6  
290 sample from a window handle; after consultation, it was confirmed that window handles had been  
291 omitted from their enhanced cleaning procedures. Additionally, surface sampling showed an area  
292 with a high positivity rate; this area was operated by a contractor who had not updated the infection  
293 control policies in line with new guidance. These findings highlight the benefit that rapid  
294 environmental sampling can offer to workplaces experiencing outbreaks.

295 Although the data presented provide substantial information regarding workplace contamination,  
296 there are several limitations that require consideration. The time from reporting a potential  
297 workplace outbreak until environmental sampling could be performed was frequently more than 14  
298 days due to site approval requirements of the study meaning some nucleic acid degradation may  
299 have occurred which would affect levels detected by qPCR. This delay also meant that air sampling  
300 of workplaces was not considered as part of the study. Additionally, while COVID-OUT was a  
301 research study, the lead organisations (UKHSA and HSE) have regulatory roles which may not only  
302 have resulted in a lower rate of participation in the study but could also have resulted in  
303 participating sites modifying the environment before the sampling team arrived as they may view  
304 the sampling visit as an official audit. Even if all sites sampled were genuine representations of the  
305 work environments at the time of cases being reported, the breadth of business and worker  
306 functions combined with epidemiological differences in local infection rates, the circulating SARS-  
307 CoV-2 variant, and increasing vaccination rates through the study period limits the conclusions that  
308 can be drawn when comparing individual sites to one another or on trends. Finally, assessment of  
309 contamination was made using qPCR Ct values; while this provide a semi-quantitative assessment, it  
310 does not distinguish between viable and degraded viral material, and variation can occur between  
311 reactions which has greater impact on accuracy near the limit of detection which was frequently the  
312 level of contamination observed in this study.

313 The environmental sampling carried out in this study provides data on the occurrence and the level  
314 of SARS-CoV-2 contamination seen in a variety of workplaces experiencing COVID-19 cases within  
315 their workforce throughout the pandemic. From a site-specific perspective, the data generated  
316 provided insight for where COVID control measures, workforce practices and regular cleaning may  
317 have been insufficient or may have lapsed; collectively, these results highlight common themes that  
318 may contribute to overall transmission either directly or as an indication of where transmission risks  
319 are the highest.

320

321 **ACKNOWLEDGMENTS**

322 The authors wish to acknowledge the contributions of the UKHSA Genomics team for sequencing  
323 samples and from the COVID-OUT workplace recruitment team (Chris Keen, Gillian Frost, Joan Cook,  
324 Gary Dobbin, Derek Morgan, Vince Sandys, Matthew Coldwell, Andrew Simpson, Adam Clarke, Alice  
325 Graham, Hannah Higgins, Christina Atchison and Helen Collins) for assistance with recruitment and  
326 completing the wider study.

327 **CONFLICTS OF INTEREST**

328 No conflict of interest declared.

329 **DISCLOSURE STATEMENT**

330 The contents of this paper, including any opinions and/or conclusions expressed, are those of the  
331 authors alone and do not necessarily reflect Health and Safety Executive or UK Health Security  
332 Agency policy.

333 **FUNDING STATEMENT**

334 This work was supported by funding from the PROTECT COVID-19 National Core Study on  
335 Transmission and Environment, managed by the Health and Safety Executive on behalf of HM  
336 Government.

337 **ETHICAL APPROVAL**

338 The COVID-OUT study has been approved by the NHS North East Research Ethics Committee  
339 (Reference 20/NE/0282).

340

341 **REFERENCES**

342 Atkinson, B., Veldhoven, K. van, Nicholls, I., Coldwell, M., Clarke, A., Frost, G., Atchison, C.J., Raja,  
343 A.I., Bennett, A.M., Morgan, D., Pearce, N., Fletcher, T., Brickley, E.B. and Chen, Y. (2022) An

344 outbreak of SARS-CoV-2 in a public-facing office in England, 2021. *medRxiv*.  
345 2022.01.31.22269194.

346 Boucau, J., Marino, C., Regan, J., Uddin, R., Choudhary, M.C., Flynn, J.P., Chen, G., Stuckwisch, A.M.,  
347 Mathews, J., Liew, M.Y., Singh, A., Lipiner, T., Kittilson, A., Melberg, M., Li, Y., Gilbert, R.F.,  
348 Reynolds, Z., Iyer, S.L., Chamberlin, G.C., Vyas, T.D., Goldberg, M.B., Vyas, J.M., Li, J.Z., Lemieux,  
349 J.E., Siedner, M.J. and Barczak, A.K. (2022) Duration of Shedding of Culturable Virus in SARS-  
350 CoV-2 Omicron (BA.1) Infection. *N Engl J Med*. **387**, 275–277.

351 Brown, R., Coventry, L. and Pepper, G. (2021) Information seeking, personal experiences, and their  
352 association with COVID-19 risk perceptions: demographic and occupational inequalities. *J Risk*  
353 *Res.* **24**, 506–520.

354 Chen, Y., Aldridge, T., Ferraro, C. and Khaw, F.-M. (2022) COVID-19 outbreak rates and infection  
355 attack rates associated with the workplace: a descriptive epidemiological study. *BMJ Open*. **12**,  
356 e055643.

357 Chen, Y., Atchison, C., Atkinson, B., Barber, C., Bennett, A., Brickley, E., Cooke, J., Dabrera, G.,  
358 Fishwick, D., Fletcher, T., Graham, A., Higgins, H., Keen, C., Morgan, D., Noakes, C., Pearce, N.,  
359 Raja, A., Sandys, V., Stocks, J., van Tongeren, M., van Veldhoven, K., Verma, A. and Curran, A.  
360 (2021) The COVID-OUT study protocol: COVID-19 outbreak investigation to understand  
361 workplace SARS-CoV-2 transmission in the United Kingdom. *Wellcome Open Res.* **6**, 201.

362 Cherrie, J.W., Cherrie, M.P.C., Smith, A., Holmes, D., Semple, S., Steinle, S., Macdonald, E., Moore, G.  
363 and Loh, M. (2021) Contamination of Air and Surfaces in Workplaces with SARS-CoV-2 Virus: A  
364 Systematic Review. *Ann Work Expo Heal.* **65**, 879–892.

365 Coil, D.A., Pechacek, R., Kaze, M., Zuniga-Montanez, R., Guerrero, R.G., Eisen, J.A., Shapiro, K. and  
366 Bischel, H.N. (2022) SARS-CoV-2 RNA Is Readily Detectable at Least 8 Months after Shedding in  
367 an Isolation Facility. *mSphere*.

368 van Doremalen, N., Bushmaker, T., Morris, D.H., Holbrook, M.G., Gamble, A., Williamson, B.N.,  
369 Tamin, A., Harcourt, J.L., Thornburg, N.J., Gerber, S.I., Lloyd-Smith, J.O., de Wit, E. and Munster,  
370 V.J. (2020) Aerosol and Surface Stability of SARS-CoV-2 as Compared with SARS-CoV-1. *N Engl J*  
371 *Med.* **382**, 1564–1567.

372 Dyal, J.W., Grant, M.P., Broadwater, K., Bjork, A., Waltenburg, M.A., Gibbins, J.D., Hale, C., Silver, M.,  
373 Fischer, M., Steinberg, J., Basler, C.A., Jacobs, J.R., Kennedy, E.D., Tomasi, S., Trout, D., Hornsby-  
374 Myers, J., Oussayef, N.L., Delaney, L.J., Patel, K., Shetty, V., Kline, K.E., Schroeder, B., Herlihy,  
375 R.K., House, J., Jervis, R., Clayton, J.L., Ortbahn, D., Austin, C., Berl, E., Moore, Z., Buss, B.F.,  
376 Stover, D., Westergaard, R., Pray, I., DeBolt, M., Person, A., Gabel, J., Kittle, T.S., Hendren, P.,  
377 Rhea, C., Holsinger, C., Dunn, J., Turabelidze, G., Ahmed, F.S., DeFijter, S., Pedati, C.S., Rattay,  
378 K., Smith, E.E., Luna-Pinto, C., Cooley, L.A., Saydah, S., Preacely, N.D., Maddox, R.A., Lundeen,  
379 E., Goodwin, B., Karpathy, S.E., Griffing, S., Jenkins, M.M., Lowry, G., Schwarz, R.D., Yoder, J.,  
380 Peacock, G., Walke, H.T., Rose, D.A. and Honein, M.A. (2020) COVID-19 Among Workers in  
381 Meat and Poultry Processing Facilities — 19 States, April 2020. *MMWR Morb Mortal Wkly Rep.*  
382 **69**.

383 European Centre for Disease Prevention and Control (2020) COVID-19 clusters and outbreaks in  
384 occupational settings in the EU/EEA and the UK. *Tech Rep.* 1–17.

385 Gholipour, S., Nikaeen, M., Mohammadi Manesh, R., Aboutalebian, S., Shamsizadeh, Z., Nasri, E. and  
386 Mirhendi, H. (2020) Severe Acute Respiratory Syndrome Coronavirus 2 (SARS-CoV-2)  
387 Contamination of High-touch Surfaces in Field Settings. *Biomed Environ Sci.* **33**, 925–929.

388 Goel, V., Gupta, S., Gupta, V. and Sahni, A.K. (2022) Environmental surface sampling for SARS-CoV-2



389 around hospitalized patients with COVID-19 in a tertiary care hospital. *Asian J Med Sci.* **13**, 27–  
390 31.

391 GOV.UK (2022) Coronavirus (Covid-19) in the UK [WWW Document]. URL  
392 <https://coronavirus.data.gov.uk>.

393 Hosseini, P., Mueller, W., Rhodes, S., Pembrey, L., van Tongeren, M., Pearce, N., Loh, M. and  
394 Fletcher, T. (2022) Transmission and Control of SARS-CoV-2 in the Food Production Sector: A  
395 Rapid Narrative Review of the Literature. *Int J Environ Res Public Health.* **19**, 12104.

396 Ke, R., Martinez, P.P., Smith, R.L., Gibson, L.L., Achenbach, C.J., McFall, S., Qi, C., Jacob, J., Dembele,  
397 E., Bundy, C., Simons, L.M., Ozer, E.A., Hultquist, J.F., Lorenzo-Redondo, R., Opdycke, A.K.,  
398 Hawkins, C., Murphy, R.L., Mirza, A., Conte, M., Gallagher, N., Luo, C.H., Jarrett, J., Conte, A.,  
399 Zhou, R., Farjo, M., Rendon, G., Fields, C.J., Wang, L., Fredrickson, R., Baughman, M.E., Chiu,  
400 K.K., Choi, H., Scardina, K.R., Owens, A.N., Broach, J., Barton, B., Lazar, P., Robinson, M.L.,  
401 Mostafa, H.H., Manabe, Y.C., Pekosz, A., McManus, D.D. and Brooke, C.B. (2022) Longitudinal  
402 Analysis of SARS-CoV-2 Vaccine Breakthrough Infections Reveals Limited Infectious Virus  
403 Shedding and Restricted Tissue Distribution. *Open Forum Infect Dis.* **9**, 1–7.

404 Liu, H., Fei, C., Chen, Y., Luo, S., Yang, T., Yang, L., Liu, J., Ji, X., Wu, W. and Song, J. (2021a)  
405 Investigating SARS-CoV-2 persistent contamination in different indoor environments. *Environ*  
406 *Res.* **202**, 111763.

407 Liu, J., Liu, J., He, Z., Yang, Z., Yuan, J., Wu, H., Zhu, P., Fu, X., Lin, Y., Zhang, Y., Zhao, Z., He, S. and  
408 Ma, X. (2021b) Duration of SARS-CoV-2 positive in quarantine room environments: A  
409 perspective analysis. *Int J Infect Dis.* **105**, 68–74.

410 Marcenac, P., Park, G.W., Duca, L.M., Lewis, N.M., Dietrich, E.A., Barclay, L., Tamin, A., Harcourt, J.L.,  
411 Thornburg, N.J., Rispens, J., Matanock, A., Kiphibane, T., Christensen, K., Pawloski, L.C., Fry,  
412 A.M., Hall, A.J., Tate, J.E., Vinjé, J., Kirking, H.L. and Pevzner, E. (2021) Detection of SARS-CoV-2  
413 on Surfaces in Households of Persons with COVID-19. *Int J Environ Res Public Health.* **18**, 8184.

414 Marsh, G.A., McAuley, A.J., Au, G.G., Riddell, S., Layton, D., Singanallur, N.B., Layton, R., Payne, J.,  
415 Durr, P.A., Bender, H., Barr, J.A., Bingham, J., Boyd, V., Brown, S., Bruce, M.P., Burkett, K.,  
416 Eastwood, T., Edwards, S., Gough, T., Halpin, K., Harper, J., Holmes, C., Horman, W.S.J., van  
417 Vuren, P.J., Lowther, S., Maynard, K., McAuley, K.D., Neave, M.J., Poole, T., Rootes, C., Rowe,  
418 B., Soldani, E., Stevens, V., Stewart, C.R., Suen, W.W., Tachedjian, M., Todd, S., Trinidad, L.,  
419 Walter, D., Watson, N., Drew, T.W., Gilbert, S.C., Lambe, T. and Vasan, S.S. (2021) ChAdOx1  
420 nCoV-19 (AZD1222) vaccine candidate significantly reduces SARS-CoV-2 shedding in ferrets. *npj*  
421 *Vaccines.* **6**, 1–8.

422 Marshall, D.L., Bois, F., Jensen, S.K.S., Linde, S.A., Higby, R., Rémy-McCort, Y., Murray, S., Dieckelman,  
423 B., Sudradjat, F. and Martin, G.G. (2020) Sentinel Coronavirus environmental monitoring can  
424 contribute to detecting asymptomatic SARS-CoV-2 virus spreaders and can verify effectiveness  
425 of workplace COVID-19 controls. *Microb Risk Anal.* **16**, 100137.

426 Mouchtouri, V.A., Koureas, M., Kyritsi, M., Vontas, A., Kourentis, L., Sapounas, S., Rigakos, G.,  
427 Petinaki, E., Tsiodras, S. and Hadjichristodoulou, C. (2020) Environmental contamination of  
428 SARS-CoV-2 on surfaces, air-conditioner and ventilation systems. *Int J Hyg Environ Health.* **230**,  
429 113599.

430 ONS (2021) Business and individual attitudes towards the future of homeworking. Analysis of the  
431 effects of the coronavirus (COVID-19) pandemic on office working and of business and  
432 individual attitudes to future working practices. [WWW Document]. URL  
433 <https://www.ons.gov.uk/employmentandlabourmarket/peopleinwork/employmentandemployeetypes/articles/businessandindividualattitudestowardsthefutureofhomeworkinguk/april2021>  
434

435 y2021.

436 Paton, S., Spencer, A., Garratt, I., Thompson, K.-A., Dinesh, I., Aranega-Bou, P., Stevenson, D., Clark,  
437 S., Dunning, J., Bennett, A. and Pottage, T. (2021) Persistence of Severe Acute Respiratory  
438 Syndrome Coronavirus 2 (SARS-CoV-2) Virus and Viral RNA in Relation to Surface Type and  
439 Contamination Concentration. *Appl Environ Microbiol.* **87**.

440 Plante, J.A., Machado, R.R.G., Mitchell, B.M., Shinde, D.P., Walker, J., Scharton, D., McConnell, A.,  
441 Saada, N., Liu, J., Khan, B., Campos, R.K., Johnson, B.A., Menachery, V.D., Levine, C.B., Ren, P.,  
442 McLellan, S.L.F., Plante, K.S. and Weaver, S.C. (2022) Vaccination Decreases the Infectious Viral  
443 Load of Delta Variant SARS-CoV-2 in Asymptomatic Patients. *Viruses.* **14**.

444 Puhach, O., Adea, K., Hulo, N., Sattonnet, P., Genecand, C., Iten, A., Jacquérior, F., Kaiser, L., Vetter,  
445 P., Eckerle, I. and Meyer, B. (2022) Infectious viral load in unvaccinated and vaccinated  
446 individuals infected with ancestral, Delta or Omicron SARS-CoV-2. *Nat Med.* **28**, 1491–1500.

447 Quick, J. (2020) nCoV-2019 sequencing protocol v3 (LoCost) V.3. *protocols.io*.

448 Riddell, S., Goldie, S., Hill, A., Eagles, D. and Drew, T.W. (2020) The effect of temperature on  
449 persistence of SARS-CoV-2 on common surfaces. *Virology.* **17**, 1–7.

450 Riemersma, K.K., Haddock, L.A., Wilson, N.A., Minor, N., Eickhoff, J., Grogan, B.E., Kita-Yarbro, A.,  
451 Halfmann, P.J., Segaloff, H.E., Kocharian, A., Florek, K.R., Westergaard, R., Bateman, A.,  
452 Jeppson, G.E., Kawaoka, Y., O'Connor, D.H., Friedrich, T.C. and Grande, K.M. (2022) Shedding of  
453 infectious SARS-CoV-2 despite vaccination. *PLoS Pathog.* **18**, 1–13.

454 de Rooij, M.M.T., Sikkema, R.S., Bouwknegt, M., de Geus, Y., Stanoeva, K.R., Nieuwenweg, S., van  
455 Dam, A.S.G., Raben, C., Dohmen, W., Heederik, D., Reusken, C., Meijer, A., Koopmans, M.P.G.,  
456 Franz, E. and Smit, L.A.M. (2023) A comprehensive sampling study on SARS-CoV-2  
457 contamination of air and surfaces in a large meat processing plant experiencing COVID-19  
458 clusters in June 2020. *J Occup Environ Med.* **Publish Ah**.

459 Ryu, B.H., Cho, Y., Cho, O.H., Hong, S.I., Kim, S. and Lee, S. (2020) Environmental contamination of  
460 SARS-CoV-2 during the COVID-19 outbreak in South Korea. *Am J Infect Control.* **48**, 875–879.

461 Saloner, B., Parish, K., Ward, J.A., DiLaura, G. and Dolovich, S. (2020) COVID-19 Cases and Deaths in  
462 Federal and State Prisons. *JAMA.* **324**, 602.

463 Sun, Z.P., Yang, S.Y., Cai, X., Han, W.D., Hu, G.W., Qian, Y., Wang, Y.Y., Zhang, R., Xie, Y.H. and Qu, D.  
464 (2022) Survival of SARS-CoV-2 in artificial seawater and on the surface of inanimate materials. *J*  
465 *Med Virol.* **94**, 3982–3987.

466 Tian, D., Song, Y., Zhang, M., Pan, Y., Ge, Z., Zhang, Y., Ren, X., Wen, J., Xu, Y., Guo, H., Yang, P., Chen,  
467 Z. and Xu, W. (2022) Genomic, immunological, and clinical analysis of COVID-19 vaccine  
468 breakthrough infections in Beijing, China. *J Med Virol.* **94**, 2237–2249.

469 Topriceanu, C.-C., Wong, A., Moon, J.C., Hughes, A.D., Chaturvedi, N., Conti, G., Bann, D., Patalay, P.  
470 and Captur, G. (2021) Impact of lockdown on key workers: findings from the COVID-19 survey  
471 in four UK national longitudinal studies. *J Epidemiol Community Health.* **75**, 955–962.

472 Warren, B.G., Nelson, A., Barrett, A., Addison, B., Graves, A., Binder, R., Gray, G., Lewis, S., Smith,  
473 B.A., Weber, D.J., Sickbert-Bennett, E.E. and Anderson, D.J. (2022) Severe acute respiratory  
474 syndrome coronavirus 2 environmental contamination in hospital rooms is uncommon using  
475 viral culture techniques. *Clin Infect Dis.* **75**, e307–e309.

476 WHO (2020) WHO Director-General's opening remarks at the media briefing on COVID-19 - 11  
477 March 2020 [WWW Document]. URL <https://www.who.int/director->

478 general/speeches/detail/who-director-general-s-opening-remarks-at-the-media-briefing-on-  
479 covid-19---11-march-2020.  
480

| Site | Workplace Sector        | Workforce size <sup>†</sup> | Estimated attack rate <sup>‡</sup> | Sampling Performed | Time from outbreak cases to sampling |
|------|-------------------------|-----------------------------|------------------------------------|--------------------|--------------------------------------|
| 001  | Manufacturing           | 200-300                     | 10%                                | March 2021         | >10 days                             |
| 002  | Manufacturing           | 200-300                     | 14%                                | March 2021         | Ongoing                              |
| 003  | Distribution            | >1000                       | 6%                                 | May 2021           | Ongoing                              |
| 004  | Office                  | 100-200                     | 12%                                | May 2021           | >14 days                             |
| 005  | Food                    | >1000                       | 3%                                 | June 2021          | Ongoing                              |
| 007  | Critical Infrastructure | 100-200 (20-30)*            | 5% (39%)                           | July 2021          | >14 days                             |
| 008  | Office                  | <50                         | 55%                                | September 2021     | Ongoing**                            |
| 009  | Manufacturing           | <50                         | 14%                                | October 2021       | >21 days                             |
| 010  | Manufacturing           | 200-300                     | 10%                                | November 2021      | >7 days                              |
| 012  | Food                    | 200-300                     | 9%                                 | January 2022       | >14 days                             |
| 013  | Food                    | 100-200                     | 21%                                | February 2022      | >21 days                             |
| 020  | Food                    | <50                         | 32%                                | March 2022         | 4 days                               |
| C1   | Critical Infrastructure | 500-1000                    | Unknown                            | July 2021          | NA                                   |
| C2   | Critical Infrastructure | 300-400                     | Unknown                            | March 2022         | NA                                   |

481 **Table 1:** Details of workplaces sampled for the presence of SARS-CoV-2 RNA as part of the COVID-  
482 OUT study. Sites 006, 011 and 014-019 did not give approval (or were not eligible) for the  
483 environmental sampling component of the study. C1 = control site 1, C2 = control site 2, NA = not  
484 applicable, Unknown = no outbreak reported but sporadic cases likely present in workforce.  
485 †Workforce size is presented as a range as this is potentially identifiable information. ‡Attack rate  
486 calculated as the number of COVID cases reported in the outbreak report divided by exact workforce  
487 size at that specific site (this does distinguish between staff working on site and those who may be  
488 working from home during the outbreak period). \*Outbreak confined to one cohort within the work  
489 environment; data provided for both the cohort and the wider workplace. \*\*Last case reported at  
490 the time of sampling; however, site was closed for nine days prior to sampling with minimal staff  
491 present.

492

493

| Site (Month)                  | Samples collected | Positive (%) | Suspected (%) | Negative (%) | Ct ≤35.0 (%) |
|-------------------------------|-------------------|--------------|---------------|--------------|--------------|
| 001 (M)                       | 36                | 14           | 3             | 19           | 2            |
| March 2021                    |                   | (38.9%)      | (8.3%)        | (52.8%)      | (5.6%)       |
| 002 (M)                       | 66                | 8            | 11            | 47           | 0            |
| March 2021                    |                   | (12.1%)      | (16.7%)       | (71.2%)      | (0.0%)       |
| 003 (D)                       | 76                | 25           | 14            | 37           | 7            |
| May 2021                      |                   | (32.9%)      | (18.4%)       | (48.7%)      | (9.2%)       |
| 004 (O)                       | 69                | 2            | 7             | 60           | 0            |
| May 2021                      |                   | (2.9%)       | (10.1%)       | (87.0%)      | (0.0%)       |
| 005 (F)                       | 60                | 1            | 6             | 53           | 1            |
| June 2021                     |                   | (1.7%)       | (10.0%)       | (88.3%)      | (1.7%)       |
| 007 (CI)                      | 90                | 0            | 0             | 90           | 0            |
| July 2021                     |                   | (0.0%)       | (0.0%)        | (100.0%)     | (0.0%)       |
| 008 1 <sup>st</sup> visit (O) | 60                | 10           | 1             | 49           | 5            |
| September 2021                |                   | (16.7%)      | (1.7%)        | (81.7%)      | (8.3%)       |
| 008 2 <sup>nd</sup> visit (O) | 42                | 1            | 1             | 40           | 0            |
| September 2021*               |                   | (2.4%)       | (2.4%)        | (95.2%)      | (0.0%)       |
| 009 (M)                       | 70                | 0            | 1             | 69           | 0            |
| October 2021                  |                   | (0.0%)       | (1.4%)        | (98.6%)      | (0.0%)       |
| 010 (M)                       | 55                | 0            | 0             | 55           | 0            |
| November 2021                 |                   | (0.0%)       | (0.0%)        | (100.0%)     | (0.0%)       |
| 012 (F)                       | 65                | 0            | 0             | 65           | 0            |
| January 2022                  |                   | (0.0%)       | (0.0%)        | (100.0%)     | (0.0%)       |
| 013 (F)                       | 69                | 0            | 0             | 69           | 0            |
| February 2022                 |                   | (0.0%)       | (0.0%)        | (100.0%)     | (0.0%)       |
| 020 (F)                       | 71                | 0            | 1             | 70           | 0            |
| March 2022                    |                   | (0.0%)       | (1.4%)        | (98.6%)      | (0.0%)       |
| Total                         | 829               | 61           | 45            | 723          | 15           |
|                               |                   | (7.4%)       | (5.4%)        | (87.2%)      | (1.8%)       |

494 **Table 2:** Sampling results from recruited workplaces reporting a recent outbreak of COVID-19 in  
495 their workforce. Type of site indicated using the following codes: (M) Manufacturing, (D)

496 Distribution, (O) Offices, (F) Food sector industry, or (CI) Critical infrastructure. Ct = Crossing  
 497 threshold value based on average of two duplicate samples against the nucleocapsid gene.

498

499

| Site (Month)              | Samples collected | Positive (%) | Suspected (%) | Negative (%) | Ct ≤35.0 (%) |
|---------------------------|-------------------|--------------|---------------|--------------|--------------|
| Control Site 1 July 2021  | 64                | 0 (0.0%)     | 2 (3.1%)      | 62 (96.9%)   | 0 (0.0%)     |
| Control Site 2 March 2022 | 72                | 1 (1.4%)     | 2 (2.8%)      | 69 (95.8%)   | 0 (0.0%)     |
| Total                     | 136               | 1 (0.7%)     | 4 (2.9%)      | 131 (96.4%)  | 0 (0.0%)     |

500 **Table 3:** Sampling results from two critical infrastructure control sites; neither site reported a recent  
 501 outbreak of COVID-19 within their workforce. Ct = Crossing threshold value based on average of two  
 502 duplicate samples against the nucleocapsid gene.

503

504

505

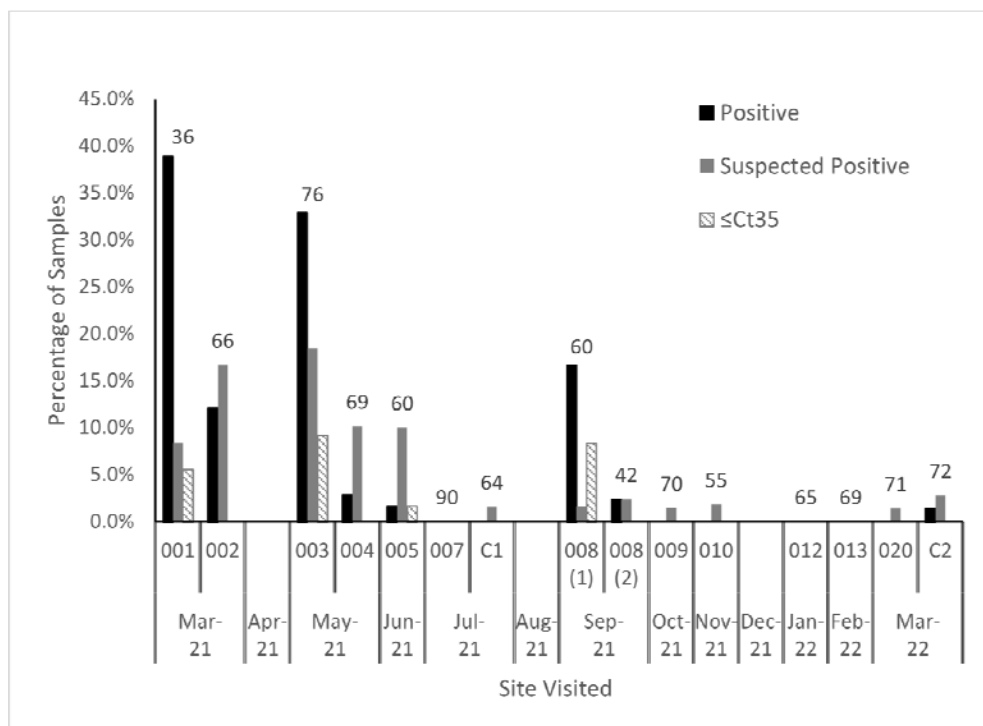

506

507 **Figure 1:** Proportion of positive samples, suspected positive samples and samples returning Ct values  
 508 of ≤35.0 by site visited.

509

510

511

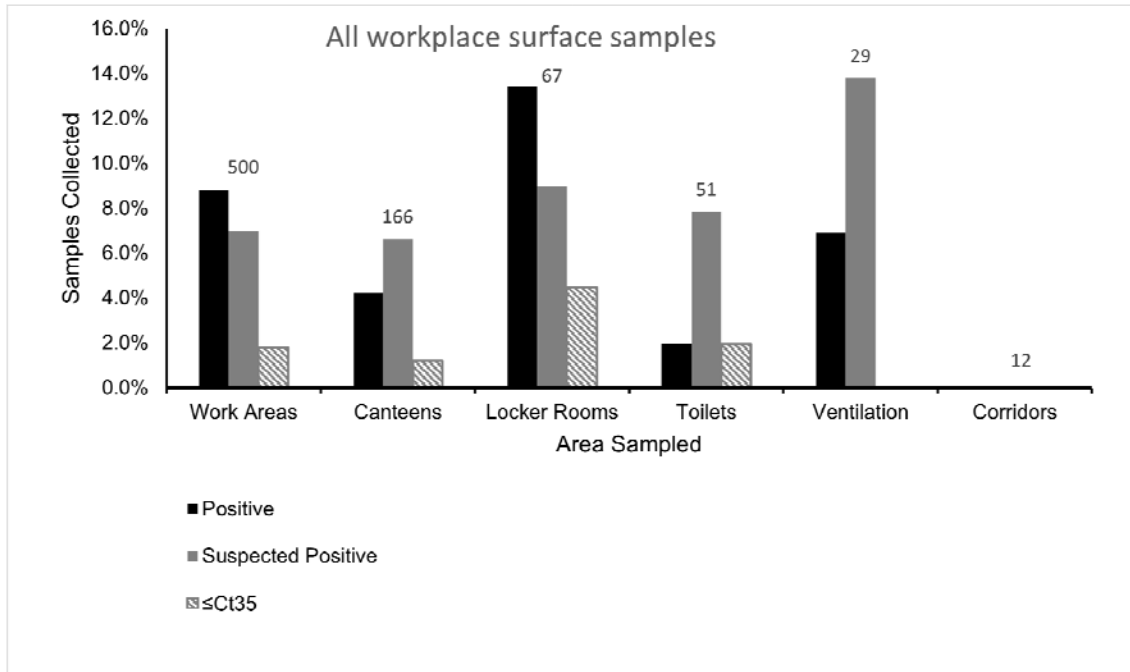

512

513 **Figure 2:** Proportion of positive samples, suspected positive samples and samples returning Ct values  
 514 of  $\leq 35.0$  from 829 surface samples collected from recruited workplace ordered by area of sampling.  
 515 Four samples, which included one suspected positive, collected from outdoor locations are not  
 516 shown for y-axis scaling purposes.

517

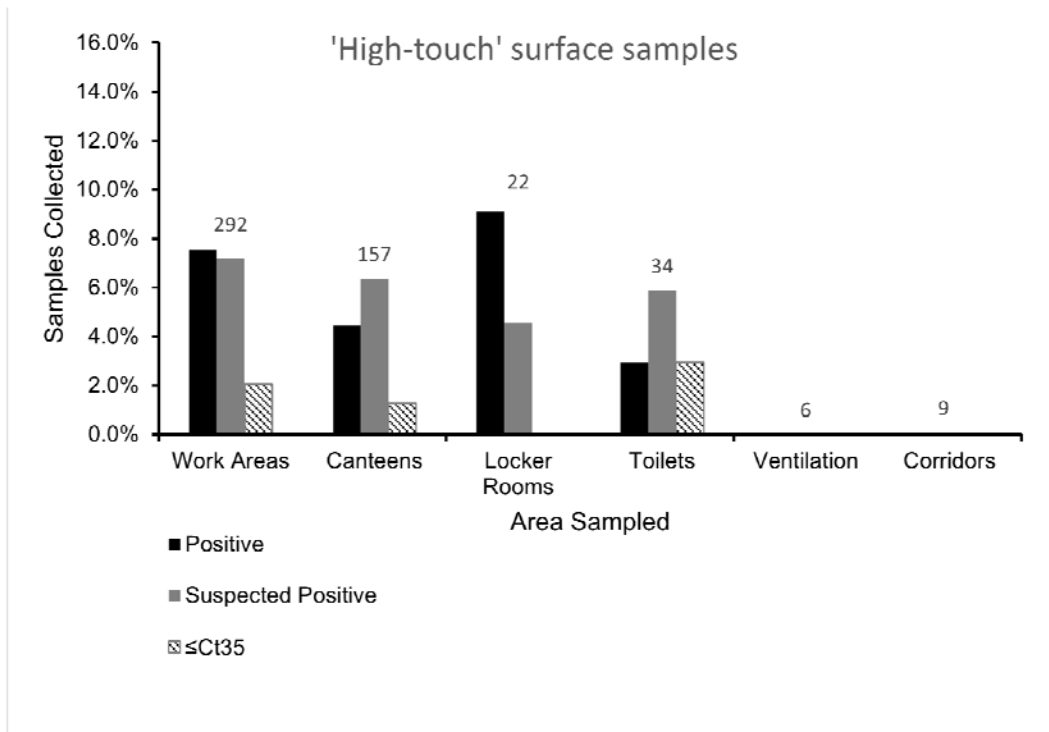

518

519 **Figure 3:** Proportion of positive samples, suspected positive samples and samples returning Ct values  
 520 of  $\leq 35.0$  from 524 surface samples classed as 'high-touch' locations collected from recruited

521 workplace ordered by area of sampling. Four samples, which included one suspected positive,  
522 collected from outdoor locations are not shown for y-axis scaling purposes.

523

524
